# Supplementary material for: γ-Aminobutyric Acid Imparts Partial Protection from Salt Stress Injury to Maize Seedlings by Improving Photosynthesis and Upregulating Osmoprotectants and Antioxidants
Source: PubMed Central journal article supplement (PMC5341084; doi:10.1038/srep43609), 2017-03-08
Supplement: srep43609-s1.pdf [file srep43609-s1.pdf]

# **$\gamma$ -Aminobutyric Acid Imparts Partial Protection from Salt Stress Injury to Maize Seedlings by Improving Photosynthesis and Upregulating Osmoprotectants and Antioxidants**

**Yongchao Wang<sup>1</sup>, Wanrong Gu<sup>1,2\*</sup>, Yao Meng<sup>1,3</sup>, Tenglong Xie<sup>1</sup>, Lijie Li<sup>1</sup>, Jing Li<sup>1,2</sup>, Shi Wei<sup>1,2</sup>**

<sup>1</sup>College of Agriculture, Northeast Agricultural University, Harbin 150030, P.R. China. <sup>2</sup>The Observation Experiment Station of Ministry of Agriculture for Crop Cultivation Science in Northeast Area, Harbin 150030, P.R. China. <sup>3</sup>Heilongjiang Academy of Land Reclamation Sciences, Harbin 100030, P.R. China.

\*Correspondence and requests for materials should be addressed to W.G. (email: wanronggu@163.com)

## Effect of various GABA concentration on maize seedling growth at salt stress 48 h

| Treatment                | Shoot fresh weight (g/plant) | Root fresh weight(g/plant) | Shoot dry weight(g/plant) | Root dry weight(g/plant) | Root length(cm/plant) | Root surface area(cm <sup>2</sup> /plant) | Root volume(cm <sup>3</sup> /plant) | The number of root tips |
|--------------------------|------------------------------|----------------------------|---------------------------|--------------------------|-----------------------|-------------------------------------------|-------------------------------------|-------------------------|
| 0 mM NaCl                | 1.81±0.07a                   | 1.39±0.05a                 | 0.427±0.004a              | 0.115±0.004a             | 310±9.53a             | 80.57±2.50a                               | 2.94±0.10a                          | 348±10.97a              |
| 150 mM NaCl              | 1.14±0.05d                   | 0.94±0.07c                 | 0.321±0.006e              | 0.086±0.001b             | 183±9.24c             | 48.46±3.01c                               | 1.78±0.13c                          | 226±9.81c               |
| 150 mM NaCl+0.25 mM GABA | 1.35±0.06c                   | 1.02±0.01bc                | 0.363±0.008c              | 0.091±0.002b             | 229±10.39b            | 60.23±2.62b                               | 1.92±0.06c                          | 236±10.39bc             |
| 150 mM NaCl+0.5 mM GABA  | 1.55±0.02b                   | 1.29±0.02a                 | 0.409±0.008b              | 0.112±0.002a             | 332±12.70a            | 75.68±4.77a                               | 2.52±0.08b                          | 331±15.01a              |
| 150 mM NaCl+1.0 mM GABA  | 1.32±0.05c                   | 1.13±0.01b                 | 0.351±0.005cd             | 0.095±0.004b             | 218±13.86bc           | 61.59±2.46b                               | 2.38±0.17b                          | 258±9.81b               |
| 150 mM NaCl+2.0 mM GABA  | 1.25±0.02cd                  | 1.06±0.02b                 | 0.345±0.004d              | 0.095±0.006b             | 239±16.17b            | 63.89±3.65a                               | 2.56±0.09b                          | 269±10.97b              |

Values are mean ±SE. Values with the same letters in a column are not significantly different at P=0.05 (LSD test).

## Effect of exogenous GABA on fresh and dry weight of maize seedling root under salt stress

| Treatment               | Root fresh weight(g) | Root dry weight |
|-------------------------|----------------------|-----------------|
| 0 mM NaCl               | 0.682±0.007a         | 0.058±0.004a    |
| 150 mM NaCl             | 0.549±0.016c         | 0.049±0.004b    |
| 300 mM NaCl             | 0.416±0.014d         | 0.036±0.002c    |
| 0 mM NaCl+0.5 mM GABA   | 0.721±0.012a         | 0.061±0.003a    |
| 150 mM NaCl+0.5 mM GABA | 0.605±0.012b         | 0.054±0.002ab   |
| 300 mM NaCl+0.5 mM GABA | 0.448±0.016d         | 0.039±0.002c    |

Values are mean ± SE. Values with the same letters in a column are not significantly different at P=0.05 (LSD test).
